# Supplementary material
Source: PubMed Central journal article supplement (PMC2993339)
Supplement: 1014465107_pnas.201014465SI.pdf [file 1014465107_pnas.201014465SI.pdf]

# Supporting Information

Nguyen et al. 10.1073/pnas.1014465107

## SI Materials and Methods

**Splenic DC Preparation and Stimulation Conditions.** Spleen cells were isolated from WT and Ahr<sup>-/-</sup> mice and counted (Fig. S24). DC from mouse spleen were prepared with Collagenase D according to the protocol of the manufacturer (Miltenyi Biotec). CD11c<sup>+</sup> splenic DC were selected by MACS. Splenic DC were seeded in 10 mL of complete RPMI medium 1640 (5 × 10<sup>5</sup> cells/mL) and stimulated for 24 h with or without LPS (1 µg/mL; Sigma) or CpG (1 µM; Gene Design Inc.).

**Measurement of Kyn Concentrations.** BMDC were cultured in complete RPMI medium 1640 plus L-Trp (100 µM). The cells were then stimulated with LPS or CpG for 18 h. Kyn levels in culture supernatants were quantified using a colorimetric method as previously described (1) with minor modifications. Briefly, 60 µL sample/standard was added to 30 µL of 30% TCA. Then, 75 µL of supernatant was added to 75 µL of freshly prepared Ehrlich Reagent (100 mg *p*-dimethylbenzaldehyde in 5 mL glacial acetic acid) in a microplate. The OD of the samples was measured at 490 nm using a microplate reader (Biorad). The Kyn concentration

was determined using a Kyn standard curve as a reference. All chemicals were purchased from Sigma.

**Western Blotting.** BMDC were stimulated with LPS or CpG for 24 h. Cells were lysed in lysis buffer (1% Nonidet P-40, 20 mM Tris·HCl, pH 7.5, 150 mM NaCl, 10 mM Na<sub>2</sub>VO<sub>4</sub>, 0.5 mM DTT, and 1/100 protease inhibitor mixture). Whole-cell lysates were analyzed by Western blotting with anti-Ahr antibodies (BIO-MOL International).

**Cytokine ELISA.** BMDC were stimulated with LPS or CpG. After 24 h, cytokine levels, including those of IL-6, TNF-α, IL-12p40, TGF-β1, and IL-10, were measured in culture supernatants using ELISAs (R&D Systems).

**CFSE Dilution Assay.** Naive T cells were incubated in 3 µM CFSE at 37 °C for 10 min following the instructions of the manufacturer (Invitrogen). CFSE-labeled naive T cells were cocultured with LPS- or CpG-stimulated BMDC. After 4 d, T-cell proliferation was assessed based on CFSE dilution using FACS analysis with a Cytomics FC500 system (Beckman Coulter).

1. Däubener W, et al. (1994) A new, simple, bioassay for human IFN-γ. *J Immunol Methods* 168:39–47.

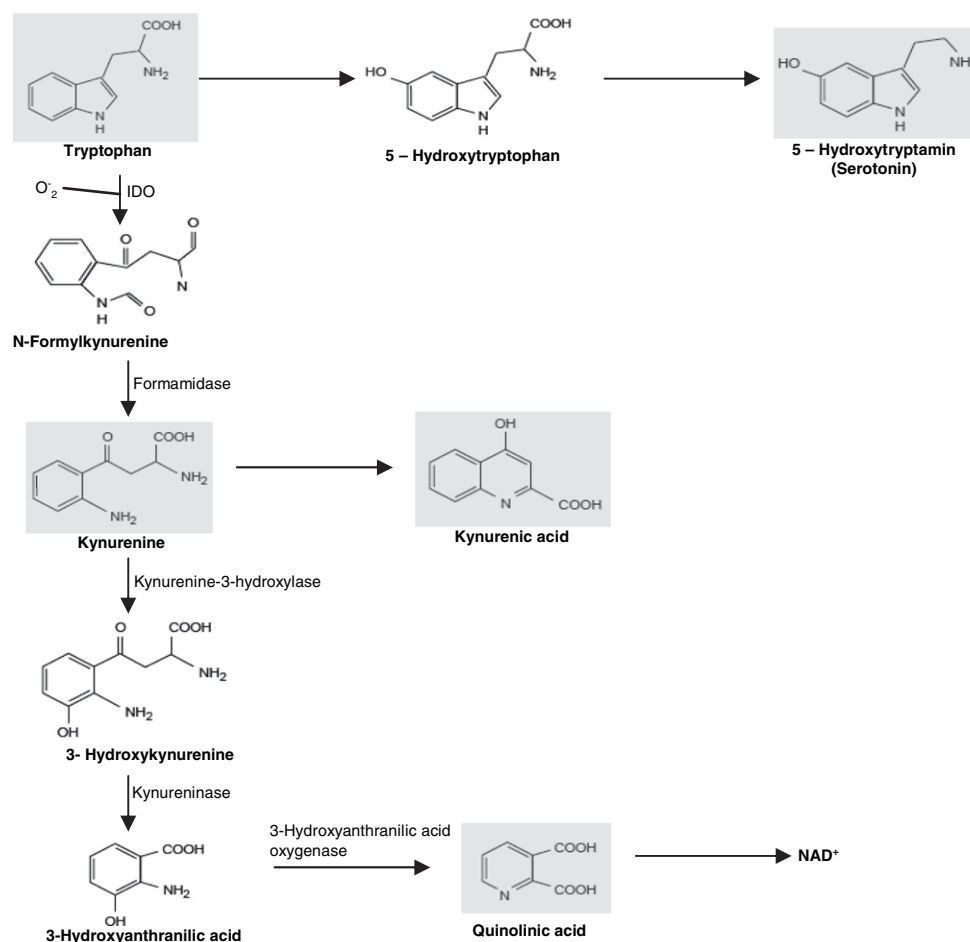

**Fig. S1.** Schematic of the Trp catabolism pathways. Trp is mainly converted into Kyn and other metabolites in the Kyn pathway via IDO and the other indicated enzymes.

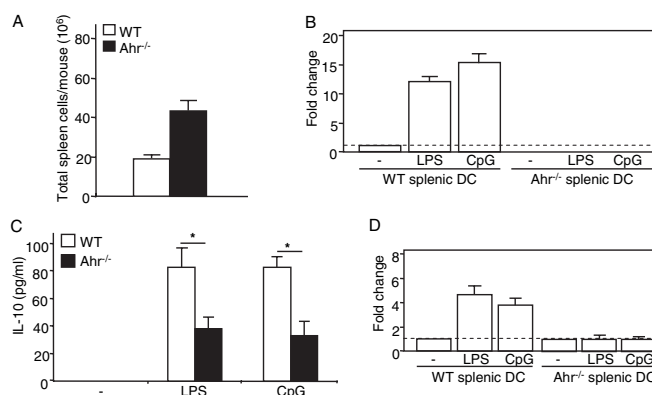

**Fig. S2.** LPS or CpG stimulated Ahr and IDO expression in splenic DC. (A) Total spleen cells per mouse. (B) Ahr expression in splenic DC stimulated with LPS or CpG. (C) IL-10 production was inhibited in Ahr<sup>-/-</sup> splenic DC stimulated with LPS or CpG. (D) IDO expression in splenic DC stimulated with LPS or CpG.

A bar graph showing IL-10 production (pg/ml) for LPS and CpG treatments. The y-axis ranges from 0 to 600 pg/ml. For LPS, DMSO is ~500, CH-223191 is ~100, and resveratrol is ~80. For CpG, DMSO is ~440, CH-223191 is ~40, and resveratrol is ~30. Significance markers (\*\*\*) are present for all comparisons between DMSO and the inhibitors.

| Treatment | DMSO (pg/ml) | CH-223191 (pg/ml) | resveratrol (pg/ml) |
|-----------|--------------|-------------------|---------------------|
| LPS       | ~500         | ~100              | ~80                 |
| CpG       | ~440         | ~40               | ~30                 |

**A**

Bar graph showing Total BM cells/mouse ( $10^6$ ) for WT (white bar) and *Ahr*<sup>-/-</sup> (black bar). The y-axis ranges from 0 to 80. WT is approximately 24, and *Ahr*<sup>-/-</sup> is approximately 44.

**B**

Flow cytometry plots showing BM cells (left column) and BMDCs (right column) for WT (top row) and *Ahr*<sup>-/-</sup> (bottom row). The y-axis is CD11b and the x-axis is CD11c. BMDCs are gated as CD11b<sup>+</sup>CD11c<sup>+</sup> cells.

**C**

Bar graph showing % MHC class II<sup>high</sup> BMDC for WT (white bar) and *Ahr*<sup>-/-</sup> (black bar) under three conditions: -, LPS, and CpG. The y-axis ranges from 0 to 80. Under -, WT is ~30% and *Ahr*<sup>-/-</sup> is ~22%. Under LPS, WT is ~50% and *Ahr*<sup>-/-</sup> is ~38%. Under CpG, WT is ~58% and *Ahr*<sup>-/-</sup> is ~43%.

3 of 3
